# Supplementary material
Source: Frontiers journal article supplement (https://www.frontiersin.org/articles/380867)
Supplement: Image_4.pdf [file Image_4.pdf]

# OC2L #27

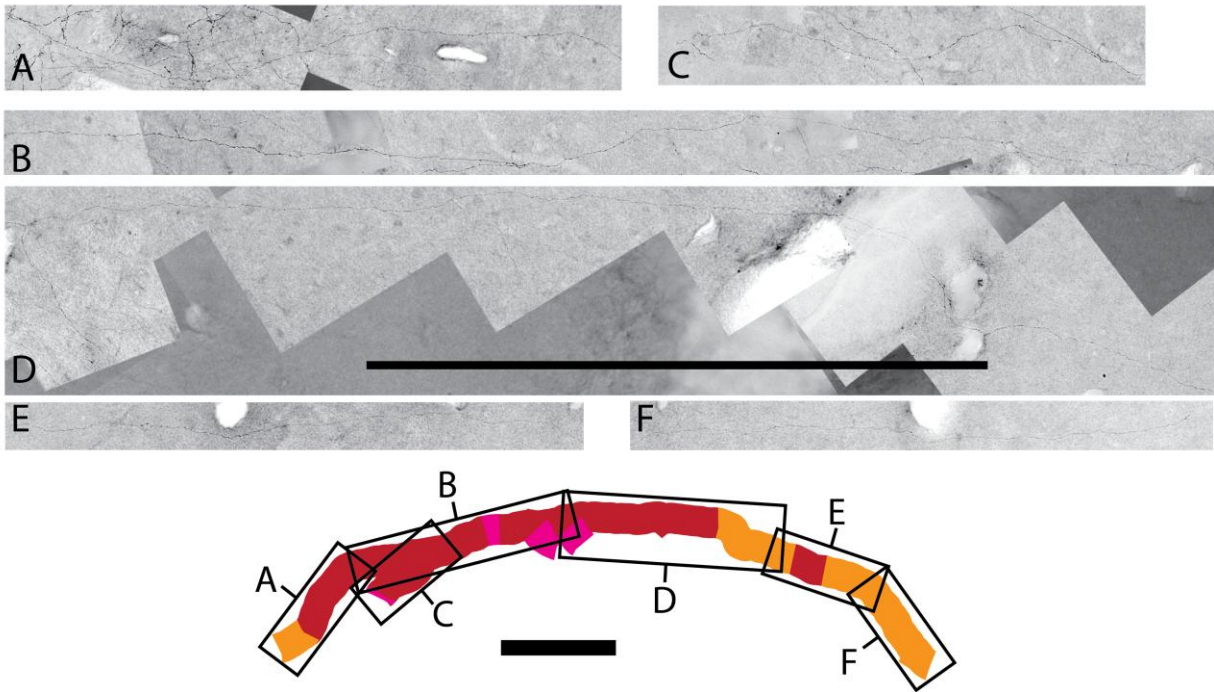

**Supplementary Figure S4** | Reconstruction of a long axon from one of the brains injected into lateral secondary occipital cortex (OC2L), indicated by a solid arrow in **Figure 5**. (**A-F**) Photomontages corresponding to the regions outlined with rectangles and labeled with the same letters in the inset at bottom. Scale bars represent 500 micrometers. Colors indicate different slices as indicated in the legend to **Figure 5**.
